# Supplementary material for: Specific Targeting of STAT3 in B Cells Suppresses Progression of B Cell Lymphoma
Source: MDPI journal article supplement (doi:10.3390/ijms241713666), 2023-09-04
Supplement: s1 [file s1]

## Supplementary Figure S1

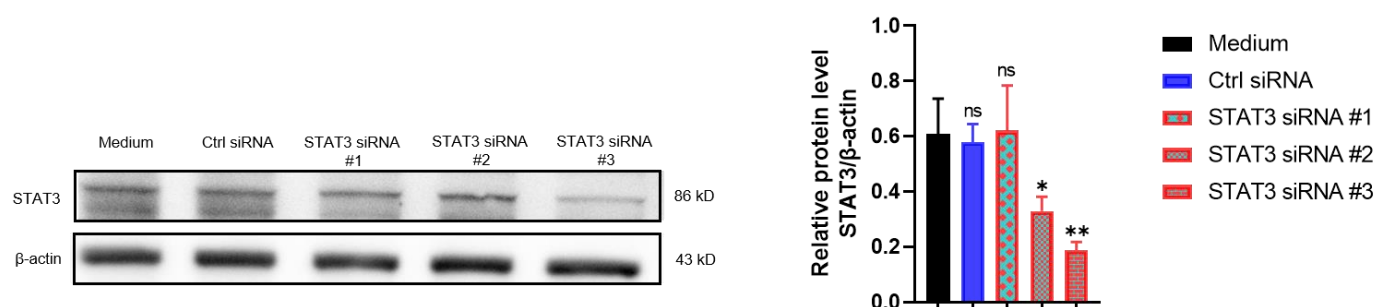

**Supplementary Figure S1.** STAT3 expression of A20 lymphoma cell treated by STAT3 siRNA. A20 cells ( $1 \times 10^6$ ) were incubated with RPMI 1640 medium (Medium), Control siRNA (Ctrl siRNA) or three different STAT3 siRNAs (STAT3 siRNA #1, #2, #3) for 24 h at 37°C. A20 cells were lysed and proteins were extracted for Western blot and quantification analysis of relative STAT3 ( $n = 3$ /group). One representative WB analysis and summarized data from three independent experiments are shown. ns, not significant; \* $P < 0.05$ ; \*\* $P < 0.01$ , compared with Medium group; Student's  $t$ -test.

## Supplementary Figure S2

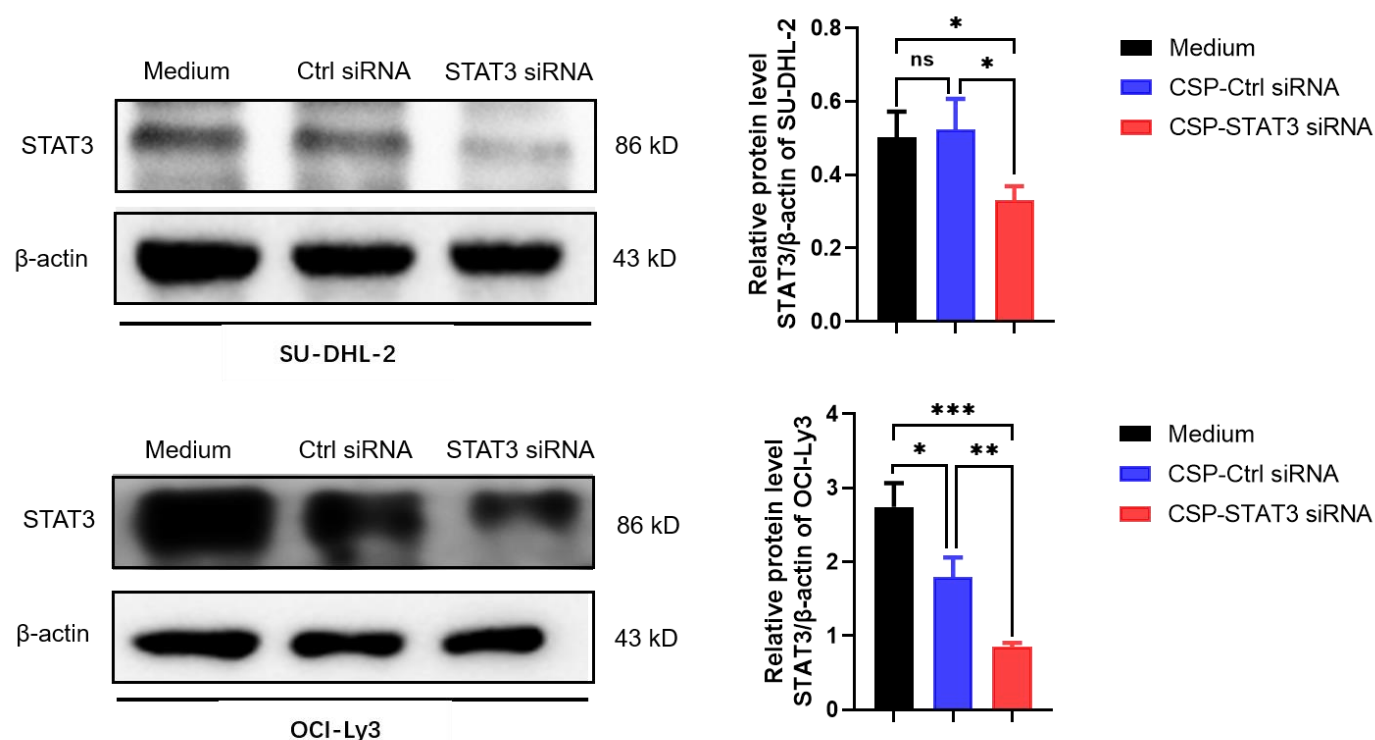

**Supplementary Figure S2.** CSP-STAT3 siRNA conjugate inhibits STAT3 expression in SU-DHL-2 and OCI-Ly3 cells. SU-DHL-2 and OCI-Ly3 cells ( $1 \times 10^6$  cells of each cell line) were incubated with RPMI 1640 medium (Medium), 60 nM CSP-Control siRNA conjugate (CSP-Ctrl siRNA) or 60 nM CSP-STAT3 siRNA conjugate (CSP-STAT3 siRNA) for 24 h

at 37°C. Cells were lysed and proteins were extracted for Western blot and quantification analysis of relative STAT3 ( $n = 3/\text{group}$ ). Shown here is one representative of three independent experiments. ns, not significant;  $*P < 0.05$ ;  $**P < 0.01$ ;  $***P < 0.001$ , one-way ANOVA.

### Supplementary Figure S3

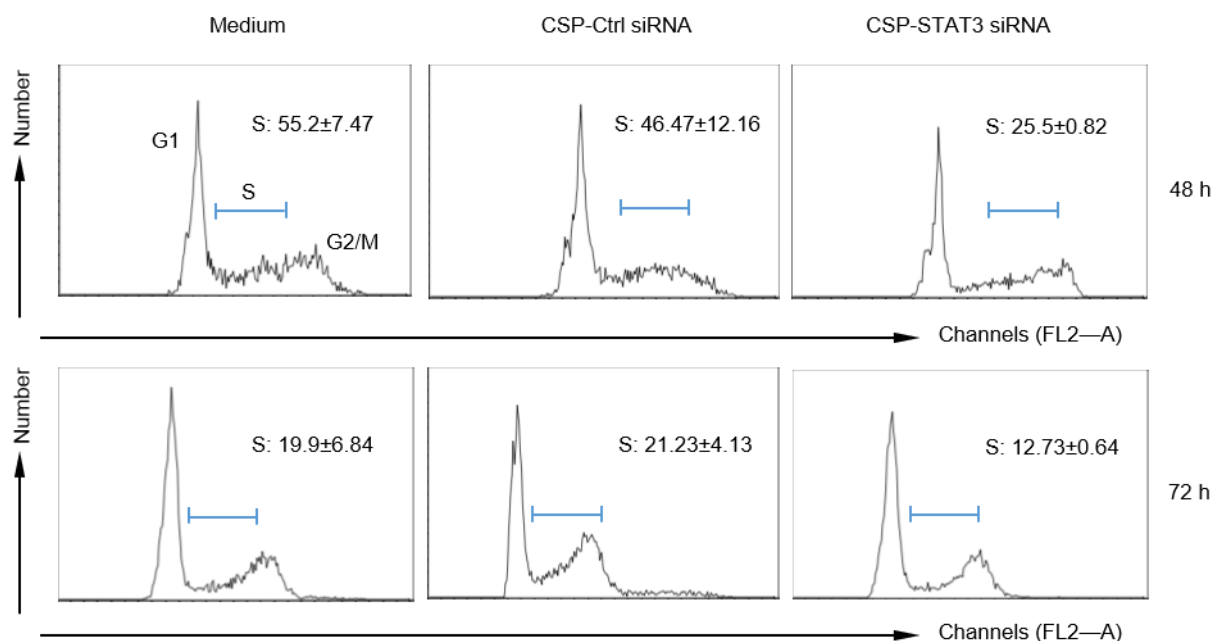

**Supplementary Figure S3.** CSP-STAT3 siRNA conjugate inhibits A20 lymphoma cell cycle. A20 cells ( $1 \times 10^6$ ) were incubated with RPMI 1640 medium (Medium), 60 nM CSP-Control siRNA conjugate (CSP-Ctrl siRNA) or 60 nM CSP-STAT3 siRNA conjugate (CSP-STAT3 siRNA) for 48 h or 72 h at 37°C. Flow cytometric analysis was performed for cell cycle analysis. Representative flow plots are shown.

## Supplementary Figure S4

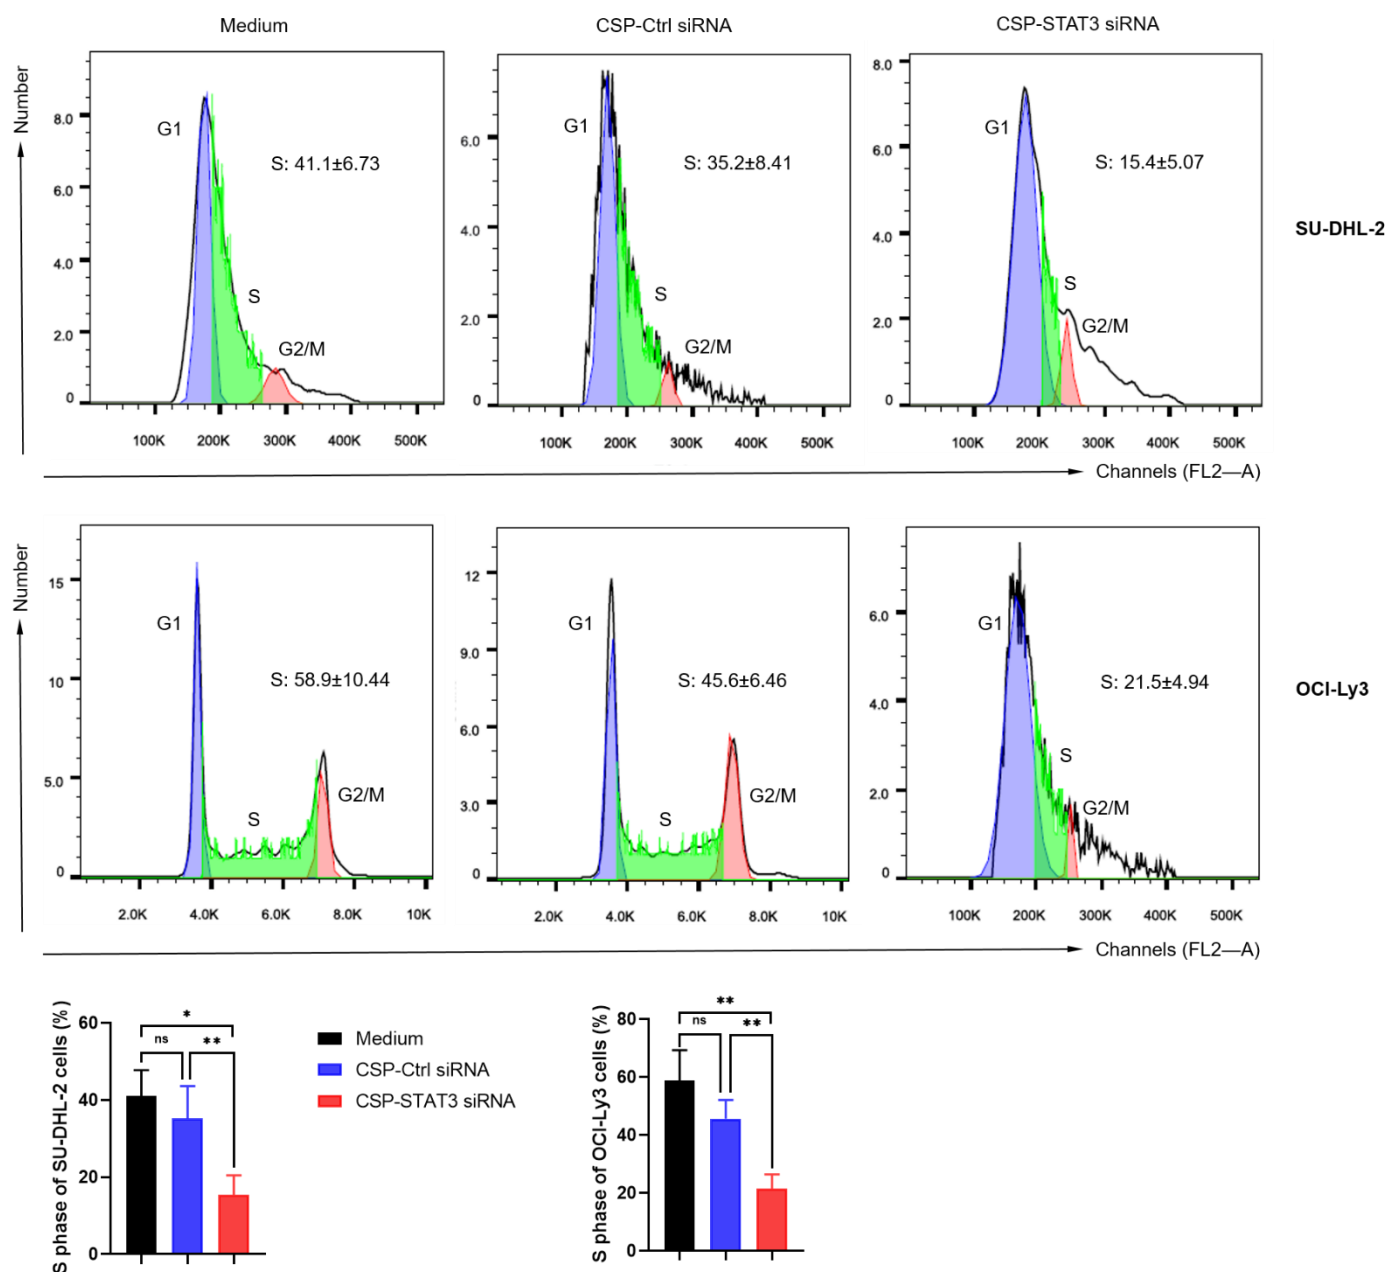

**Supplementary Figure S4.** CSP-STAT3 siRNA conjugate inhibits cell cycle of SU-DHL-2 and OCI-Ly3 cells. SU-DHL-2 and OCI-Ly3 cells ( $1 \times 10^6$ ) were incubated with RPMI 1640 medium (Medium), 60 nM CSP-Control siRNA conjugate (CSP-Ctrl siRNA) or 60 nM CSP-STAT3 siRNA conjugate (CSP-STAT3 siRNA) for 24 h at 37°C. Flow cytometric analysis was performed for cell cycle analysis. Representative flow plots and summarized data are shown as the mean  $\pm$  sem ( $n = 3$ ). ns, not significant; \* $P < 0.05$ ; \*\* $P < 0.01$ , one-way ANOVA.

## Supplementary Figure S5

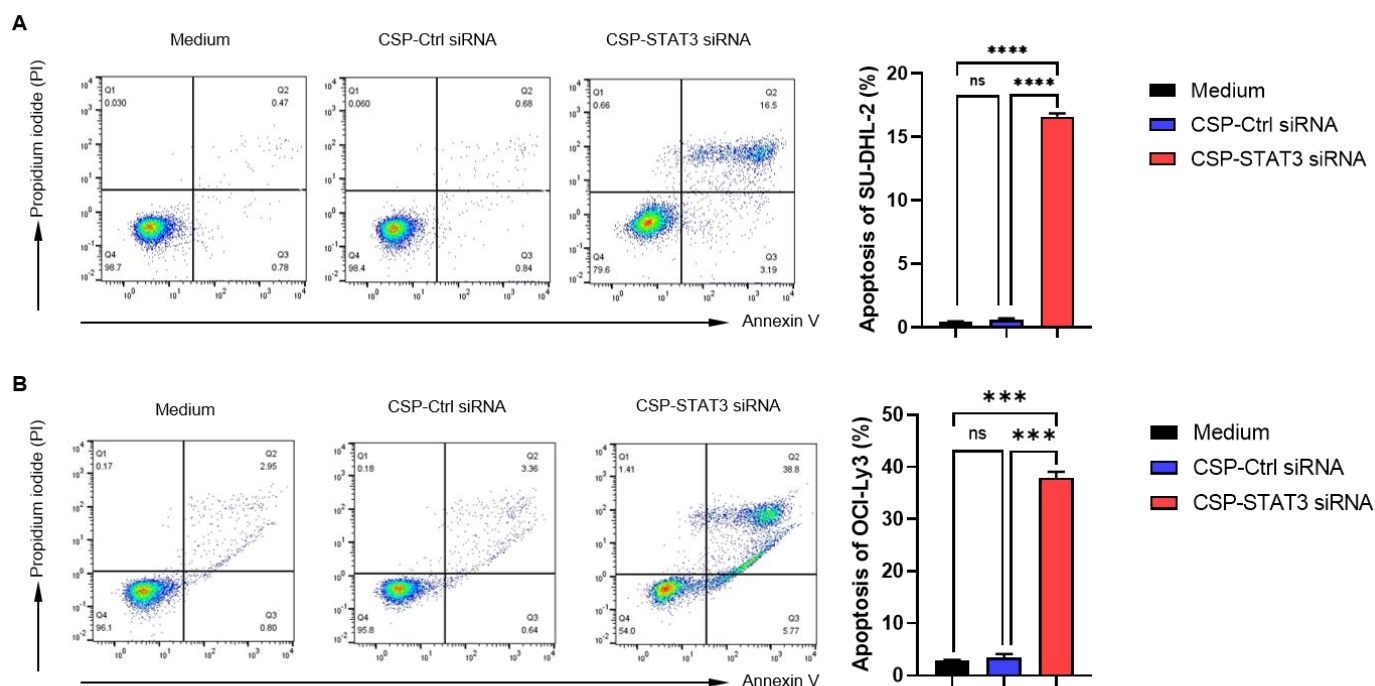

**Supplementary Figure S5.** CSP-STAT3 siRNA conjugate induces apoptosis of SU-DHL-2 and OCI-Ly3 cells. **(A)** SU-DHL-2 cells ( $1 \times 10^6$ ) were incubated with RPMI 1640 medium (Medium), 60 nM CSP-Control siRNA conjugate (CSP-Ctrl siRNA) or 60 nM CSP-STAT3 siRNA conjugate (CSP-STAT3 siRNA) for 24 h at 37°C. Apoptosis assay was performed and analyzed by flow cytometry. Representative flow plots and summarized data are shown ( $n = 3$ ). ns, not significant; \*\*\*\* $P < 0.0001$ , Student's  $t$ -test. **(B)** OCI-Ly3 cells ( $1 \times 10^6$ /group) were treated with or without CSP-Ctrl siRNA and CSP-STAT3 siRNA for 24 h at 37°C. Apoptosis assay was performed and analyzed by flow cytometry. Representative flow plots and summarized data are shown ( $n = 3$ ). ns, not significant; \*\*\* $P < 0.001$ , Student's  $t$ -test.
